# Supplementary material for: Steric control of redox events in organo-uranium chemistry: synthesis and characterisation of U(v) oxo and nitrido complexes
Source: Chem Sci. 2016 Apr 11;7(7):4624–32. doi: 10.1039/c6sc00632a (PMC6013772; doi:10.1039/c6sc00632a)
Supplement: SC-007-C6SC00632A-s001 [file SC-007-C6SC00632A-s001.pdf]

**Steric Control of Redox Events in Organo-uranium chemistry: Synthesis and Characterisation of U(V) Oxo and Nitrido complexes.**

Nikolaos Tsoureas,<sup>a</sup> Alexander F.R. Kilpatrick,<sup>b</sup> Christopher J. Inman<sup>a</sup> and F. Geoffrey N. Cloke. <sup>a\*</sup>

<sup>a</sup> *School of Life Sciences, Division of Chemistry, University of Sussex, Falmer, Brighton, BN1 9QJ, U.K.*

<sup>b</sup> *Chemistry Research Laboratory, Department of Chemistry, University of Oxford, 12 Mansfield Road, OX1 3TA, Oxford, U.K.*

**Electronic Supplementary Information**

## Experimental:

**General considerations:** All manipulations were carried out in a MBraun glovebox under N<sub>2</sub> or Ar (O<sub>2</sub> and H<sub>2</sub>O <1 ppm) or by using standard Schlenk techniques under Ar (BOC pureshield) passed through a column containing BASF R3-11(G) catalyst and activated molecular sieves (4 Å). All glassware was dried at 160 °C overnight prior to use. Filter cannulas were prepared using Whatman 25 mm glass microfiber filters and were pre-dried at 160 °C overnight. THF and toluene were dried over molten K and distilled under a N<sub>2</sub> atmosphere and were kept in Young ampoules over activated molecular sieves (4 Å) or a potassium mirror, respectively, under Ar. Hydrocarbons, <sup>t</sup>BuOMe and Et<sub>2</sub>O were dried over NaK, distilled under a N<sub>2</sub> atmosphere, and kept in Young ampoules over a potassium mirror or activated 4 Å molecular sieves (Et<sub>2</sub>O) under Ar. SiMe<sub>4</sub> (99%) was purchased from Aldrich, degassed by three freeze–thaw cycles and dried by stirring over NaK alloy for three days before being vacuum distilled and kept over molecular sieves (4 Å) in an Ar glovebox at -35 °C. Deuterated toluene, benzene, THF and dioxane were degassed by three freeze–thaw cycles, dried by refluxing over K for 3 days, vacuum distilled, and kept in Young ampoules in the glovebox under N<sub>2</sub>. [U{η<sup>8</sup>-C<sub>8</sub>H<sub>6</sub>(1,4-Si<sup>i</sup>Pr<sub>3</sub>)<sub>2</sub>}(η<sup>5</sup>-Cp\*)(THF)} (1),<sup>i</sup> [U{η<sup>8</sup>-C<sub>8</sub>H<sub>6</sub>(1,4-SiMe<sub>3</sub>)<sub>2</sub>}(η<sup>5</sup>-Cp\*)] (2),<sup>ii</sup> {U[η<sup>8</sup>-C<sub>8</sub>H<sub>6</sub>(1,4-Si<sup>i</sup>Pr<sub>3</sub>)<sub>2</sub>}(η<sup>5</sup>-Cp\*)Cl} (8)<sup>iii</sup> were prepared according to literature. NaN<sub>3</sub> (>99%) was purchased from Aldrich, dried overnight at 150 °C under dynamic high vacuum (10<sup>-7</sup> mbar) and stored in a glovebox. Isocyanides and <sup>t</sup>BuNC were purchased from Aldrich, freeze-thaw-degassed (x3) and kept over 4 Å molecular sieves in Young's ampoules. <sup>1</sup>H, <sup>29</sup>Si{<sup>1</sup>H}, and <sup>23</sup>Na{<sup>1</sup>H} NMR data were recorded on a Varian VNMR S400 spectrometer operating at 400 MHz (<sup>1</sup>H). The spectra were referenced internally to the residual protic solvent (<sup>1</sup>H), or externally relative to SiMe<sub>4</sub> (<sup>29</sup>Si{<sup>1</sup>H}) and NaCl in D<sub>2</sub>O (<sup>23</sup>Na{<sup>1</sup>H}). All spectra were recorded at 30 °C unless otherwise stated. EI-MS mass spectra were recorded on a VG-Autospec Fisons instrument at the University of Sussex unless otherwise stated. In-situ IR spectroscopy was performed using a Mettler-Toledo Autochem ReactIR 15 instrument. Elemental analyses were performed at the Microanalysis Service of the School of Chemistry at University of Bristol.

Synthesis of [U{η<sup>8</sup>-C<sub>8</sub>H<sub>6</sub>(1,4-Si<sup>i</sup>Pr<sub>3</sub>)<sub>2</sub>}(η<sup>5</sup>-Cp\*)O] (3): In an Ar glove-box, a Young's ampoule was charged with 620 mg (0.72 mmol) [U{η<sup>8</sup>-C<sub>8</sub>H<sub>6</sub>(1,4-Si<sup>i</sup>Pr<sub>3</sub>)<sub>2</sub>}(η<sup>5</sup>-Cp\*)(THF)} (1). This was dissolved in *ca* 15 mL benzene with vigorous stirring to give a dark black-brown solution which was treated at RT with 94 μL of <sup>t</sup>BuNCO (d = 0.868 mg/ mL, 0.82 mmol, 1.1 mol eq), resulting in a colour change to dark brown-red. The reaction mixture was allowed to stir for 2 hours and volatiles were removed in vacuum slowly with the help of a 45-55 °C water bath and the brown residue dried. This was dissolved in *ca* 10 mL of n-C<sub>5</sub> and the solution placed in a lukewarm water bath (35-45 °C) before carefully evacuating volatiles over *ca.* 10 min while maintaining the temperature of the water bath. This was repeated three times. The resulting solid was dissolved in TMS<sub>2</sub>O with gentle heating and filtered hot. The volume of this solution was slowly reduced under vacuum to *ca.* 1-2 mL upon which time crystals started forming. It was placed in a -45 °C freezer overnight before the crystals were isolated by filtration and washed with cold (-80 °C) nC<sub>5</sub> to give a first crop of the title compounds. The combined washings and mother-liquor produced a second crop upon cooling at -35 °C in a glovebox freezer, while a third crop was obtained by removing the volatiles of the supernatant of the second crop, redissolving in SiMe<sub>4</sub>/nC<sub>5</sub> (*ca* 2:1 ~2-3 mL), slowly evaporating in an Ar box (*ca* 1mL) and refrigerating at -35 °C. Crystals suitable for X-ray diffraction were grown from a saturated solution of (3) in SiMe<sub>4</sub>/nC<sub>5</sub>. Combined yield: 320 mg (55%). <sup>1</sup>H-NMR δ(C<sub>6</sub>D<sub>6</sub>): -6.18 (br s, 18H, CH(CH<sub>3</sub>)<sub>2</sub>), -5.04 (br

s, 6H,  $\text{CH}(\text{CH}_3)_2$ ), 0.71 (br s, 18H,  $\text{CH}(\text{CH}_3)_2$ ), 2.54 (br s, 15H,  $\text{C}_5\text{Me}_5$ );  $^{29}\text{Si}\{^1\text{H}\}$ -NMR  $\delta(\text{C}_6\text{D}_6)$ : -72.7 (s,  $\text{Si}^i\text{Pr}_3$ ); EI-MS: 806 (M), 671 (M-Cp\*), 135 (Cp\*), 72 ( $\text{SiMe}_3$ ); Elem. Anal: Calcd. for  $\text{C}_{36}\text{H}_{43}\text{OSi}_2\text{U} \cdot 0.3(\text{SiMe}_3)_2\text{O}$ : C 53.06, H 8.09; Found: C 52.97, H 7.71.

Reaction of (3) with  $^t\text{BuNC}$ : 28 mg (0.035 mmol) of (3) were dissolved in a Young's NMR tube and the solution was treated with 4  $\mu\text{L}$  of  $^t\text{BuNC}$  at RT administered via a microsyringe and the NMR spectra collected.  $^1\text{H}$ -NMR ( $\delta$   $\text{C}_6\text{D}_6$ ): -5.48 (2 overlapping broad s., 18H,  $\text{CH}(\text{CH}_3)_2$ ), -4.40 ppm (br. s., 6H  $\text{CH}(\text{CH}_3)_2$ ), 0.76 and 0.87 (2 overlapping singlets, 27H,  $\text{CH}(\text{CH}_3)_2$  and  $(\text{CH}_3)_3\text{C-NC}$ ), 2.59 (br. s., 15H  $\text{C}_5\text{Me}_5$ );  $^{29}\text{Si}\{^1\text{H}\}$ -NMR  $\delta(\text{C}_6\text{D}_6)$ : -72 (s,  $\text{Si}^i\text{Pr}_3$ ).

Reaction of  $[\text{U}\{\eta^8\text{-C}_8\text{H}_6(1,4\text{-SiMe}_3)_2\}(\eta^5\text{-Cp}^*)]$  (2) with  $^t\text{BuNCO}$ : A Young's NMR tube was charged with 30 mg (0.043 mol) of (2) that were dissolved in  $\text{C}_6\text{D}_6$ . To this brown-olive green solution was added *via* microsyringe 5.5  $\mu\text{L}$  (1.1 mol eq) of  $^t\text{BuNCO}$  resulting in an immediate colour change to bright red.

Independent Synthesis of  $\{\text{U}[\eta^8\text{-C}_8\text{H}_6(1,4\text{-Si}^i\text{Pr}_3)_2](\eta^5\text{-Cp}^*)\}_2(\mu\text{-O})$  (5) from (1) and  $\text{N}_2\text{O}$ : 210 mg (0.245 mmol) of (1) were dissolved in  $d_8$ -toluene (*ca.* 1 mL) in a 50 mL Young's ampule with a capillary sidearm, connected to a Töpler line and degassed at -78 °C for 5 minutes. This solution was treated with exactly 0.5 mol eq of  $\text{N}_2\text{O}$  at this temperature with stirring and the reaction was left to equilibrate at RT over 2 hours to produce an intense red solution.  $^1\text{H}$ -NMR spectroscopy showed conversion to (6) in *ca.* 90%. Volatiles were removed in vacuum and the red residue was dissolved in  $^t\text{BuOMe}$  (*ca.* 5 mL) and upon cooling at 5 °C produced crystals of the title compound as the  $^t\text{BuOMe}$  solvate that were isolated by filtration and dried in vacuum. Yield: 140 mg (79.1%). Spectroscopic data were identical to the ones previously reported. NOTE: If an excess of  $\text{N}_2\text{O}$  is used, the reaction yields brown green solids that are insoluble in organic solvents.

NMR scale reaction of (3) with (1): A Young's NMR tube was charged with 15 mg (0.0186 mmol) of (3) and 16 mg (1 mol eq) of (1) and the two solids were dissolved in  $\text{C}_6\text{D}_6$  and the NMR spectra recorded.

Reaction of (1) with  $\text{SiMe}_3\text{NCO}$  (7): 25.7 mg (0.030 mmol) of (1) were dissolved in  $\text{C}_6\text{D}_6$  in a Young's NMR tube and were treated at RT with 4  $\mu\text{L}$  (1 mol eq,  $d = 0.859 \text{ mg}/\mu\text{L}$ ) to yield almost instantly a deep red solution. The spectra were recorded and are identical to those reported below for the independent synthesis of (7).

Synthesis of  $\text{NaOSiMe}_3$ : A suspension of NaH (723 mg, 30.1 mmol) in toluene (20 mL) placed in a high pressure ampoule was treated with a solution of 2.26 g (25.1 mmol) of degassed and dried overnight over 4Å molecular sieves  $\text{Me}_3\text{SiOH}$  (purchased from Aldrich) in toluene (20 mL) dropwise at 0 °C over *ca.* 30 min. After the addition was complete the reaction mixture was let to warm at RT before being placed under partial vacuum and heated at 85 °C in a thermostated oil bath overnight. It was then filtered *via* cannula and the volatiles removed to afford a gummy solid. This was dissolved in the minimum amount of n-pentane (5-10 mL) and refrigerated at -45 °C over 48 hrs before the crystals were isolated by filtration at -80 °C, washed with cold (-80 °C) n-pentane (2 x 5 mL) and dried in vacuum. Yield: 1.2 g (50%).  $^1\text{H}$ -NMR ( $\delta$   $\text{C}_6\text{D}_6$ ): 0.17 (s, 9H,  $\text{SiMe}_3$ );  $^{29}\text{Si}\{^1\text{H}\}$ -NMR ( $\delta$   $\text{C}_7\text{D}_8$ ): -5.11 (s,  $\text{SiMe}_3$ ).

Independent synthesis of  $[\text{U}\{\eta^8\text{-C}_8\text{H}_6(1,4\text{-Si}^i\text{Pr}_3)_2\}(\eta^5\text{-Cp}^*)(\text{OSiMe}_3)]$  (7):  $[\text{U}\{\eta^8\text{-C}_8\text{H}_6(1,4\text{-Si}^i\text{Pr}_3)_2\}(\eta^5\text{-Cp}^*)\text{Cl}]$  (8) and NaOTMS were placed in a Young's ampoule in an Ar glovebox and THF (*ca.* 5 mL)

was added at RT and the mixture let to stir for 30 minutes. Volatiles were removed in vacuum and the bright red residue was dried in vacuum. It was taken in SiMe<sub>4</sub> (ca 10 mL) before being filtered through a small plug of Celite in a filter pipette. The solution was let to evaporate slowly to almost dryness before being placed at -35 °C to produce the title compound as red crystals. <sup>1</sup>H-NMR (δ C<sub>6</sub>D<sub>6</sub>): -75.18 (s, 2H, CH), -43.45 (s, 2H, CH), -16.30 (s, 6H, CH(CH<sub>3</sub>)<sub>2</sub>), -13.32 (d, <sup>3</sup>J<sub>HH</sub> = 5.72 Hz, 18H, CH(CH<sub>3</sub>)<sub>2</sub>), -9.38 (d, <sup>3</sup>J<sub>HH</sub> = 7.63 Hz, 18H, CH(CH<sub>3</sub>)<sub>2</sub>), -4.49 (s, 15H, C<sub>5</sub>(CH<sub>3</sub>)<sub>5</sub>), 30.32 (s, 9H, Si(CH<sub>3</sub>)<sub>3</sub>), 95.74 (s, 2H, CH); <sup>29</sup>Si{<sup>1</sup>H}-NMR (δ C<sub>6</sub>D<sub>6</sub>): -128.81 (the other Si environment-presumably the OSiMe<sub>3</sub> one- could not be located); EI-MS: 879 (M), 744 (M-Cp\*), 461 (UCp\*OSiMe<sub>3</sub>), 157 ((Si<sup>i</sup>Pr<sub>3</sub>)<sub>3</sub>), 115 (H(Si<sup>i</sup>Pr<sub>3</sub>)<sub>2</sub>); Elem. Anal.: Calcd for C<sub>39</sub>H<sub>72</sub>OSi<sub>3</sub>U: C 53.27; H 8.25. Found: C 53.58; H 7.93.

#### Discussion of the molecular structure of (7):

Crystals suitable for single crystal XRD were obtained from the absolute minimum of SiMe<sub>4</sub> (ca. 0.5 mL). An ORTEP diagram of its molecular structure is presented in **Figure S11**.

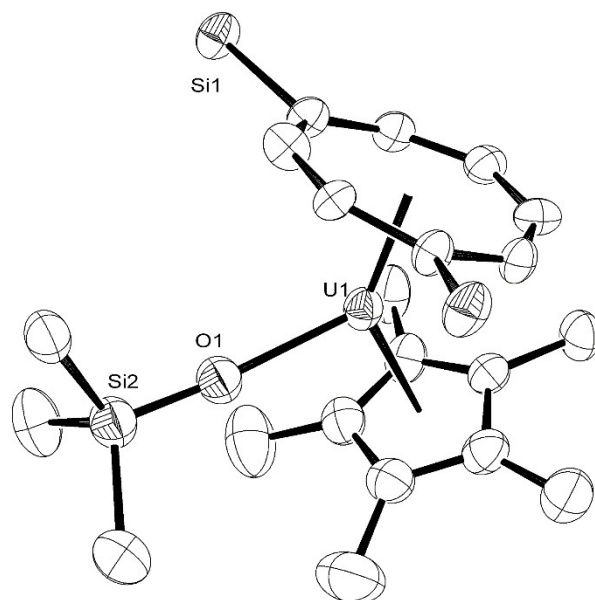

**Figure S11:** ORTEP diagram of the molecular structure of (7) displaying 50% probability ellipsoids. Hydrogen atoms and <sup>i</sup>Pr groups have been omitted for clarity. Selected bond lengths (Å) and angles (°): O1-Si2 1.55(2), O1-U1 2.215(18), Ct(COT)-U1 1.953(8), Ct(Cp\*)-U1 2.485(2); Si2-O1-U1 173.8(12), Ct(COT)-U1-Ct(Cp\*) 135.21(6).

The only salient feature of this molecular structure is the rather long U-O bond distance compared to [U{OSi(Mes)<sub>3</sub>}<sub>3</sub>]<sub>2</sub>(μ-η<sup>1</sup>:η<sup>1</sup>-N<sub>2</sub>)<sup>iv</sup>, [U{OSiMes<sub>3</sub>}<sub>4</sub>]<sup>iv</sup>, U{Cp<sup>3T</sup>}<sub>2</sub>(OSiMe<sub>3</sub>)CN (Cp<sup>3T</sup> = (C<sub>5</sub>H<sub>2</sub>)<sup>t</sup>Bu<sub>3</sub>)<sup>v</sup>, UCp<sub>3</sub>OSiPh<sub>3</sub><sup>vi</sup>, [U{OSi(Mes)<sub>3</sub>}<sub>3</sub>]{N(SiMe<sub>3</sub>)<sub>2</sub>}<sub>3</sub><sup>iv</sup> and [U{OSi(O<sup>t</sup>Bu)<sub>3</sub>}<sub>2</sub>]{μ-OSi(O<sup>t</sup>Bu)<sub>3</sub>}<sub>2</sub><sup>vii</sup>. A possible reason for this is to reduce the steric congestion due to the bulky Si<sup>i</sup>Pr<sub>3</sub> substituted COT ligand. All other metric features are as expected and warrant no further discussion.

Synthesis of [U{η<sup>8</sup>-C<sub>8</sub>H<sub>6</sub>(1,4-Si<sup>i</sup>Pr<sub>3</sub>)<sub>2</sub>}(η<sup>5</sup>-Cp\*)NNa(OEt<sub>2</sub>)<sub>2</sub>](9): 320 mg (0.38 mmol) of (1) and 26 mg (1.02 mol eq) of NaN<sub>3</sub> were charged in a Young's ampule in an Ar box and toluene and THF was

added to the solids (*ca.* 2:1 v/v 10 mL total) at RT and the reaction mixture was stirred overnight. Volatiles were removed in vacuum to leave a brown-red residue that was extracted in warm (almost boiling) Et<sub>2</sub>O filtered hot (3x5 mL) followed by extraction and filtration of the remaining residue with hot toluene (not boiling) (*ca.* 5 mL). Upon standing at RT the filtrate starts depositing crystals. The volume was slowly reduced to *ca.* 5 mL and refrigerated at -45 °C overnight to complete crystallisation. The crystals were isolated by filtration cold -45 °C and washed with cold (-45 °C) nC<sub>5</sub> and dried in vacuum to yield the title compound. A second crop (*ca.* 10-20 mg) was isolated by refrigeration (-45 °C) of the combined wash and mother-liquor but was not as pure as the first one. Crystals suitable for X-ray diffraction were grown by slow evaporation of a saturated solution of (**9**) in Et<sub>2</sub>O. Analytically pure samples were obtained from recrystallization from hot dioxane. Yield (1<sup>st</sup> crop): 90 mg (24.3%). <sup>1</sup>H-NMR (δ(C<sub>4</sub>D<sub>8</sub>O)): -7.63 (br. s., 18H, CH(CH<sub>3</sub>)<sub>2</sub>), -2.10 and -1.10 (overlapping br. s., 24H, CH(CH<sub>3</sub>)<sub>2</sub>), 1.08 (t, <sup>3</sup>J<sub>HH</sub> = 6.68 Hz, 12H, (CH<sub>3</sub>CH<sub>2</sub>)<sub>2</sub>O), 3.35 (q., <sup>3</sup>J<sub>HH</sub> = 6.68 Hz, 8H, (CH<sub>3</sub>CH<sub>2</sub>)<sub>2</sub>O); <sup>29</sup>Si{<sup>1</sup>H}-NMR (δ C<sub>4</sub>D<sub>8</sub>O): -70.9; <sup>23</sup>Na{<sup>1</sup>H}-NMR (δ C<sub>4</sub>D<sub>8</sub>O<sub>2</sub>): 200 (Δv<sub>1/2</sub> = 8300 Hz). No molecular ion could be observed. Elem. Anal: Calcd. for C<sub>44</sub>H<sub>83</sub>NaNO<sub>2</sub>Si<sub>2</sub>U: C 54.18, H 8.58, N 1.44; Found: C 53.78, H 8.49, N 1.55.

Synthesis of [ $\{U[\eta^8-C_8H_6(1,4-SiMe_3)_2](\eta^5-Cp^*)\}_2(\mu-N)]-[Na(THF)_x]^+$  (**10/10'**): This was prepared as in the case of (**9**) from 400 mg (0.576 mmol) of (**2**) and 20 mg (0.53 mol eq) of NaN<sub>3</sub> and after removal of the toluene/THF reaction solvent mixture, the brown residue was extracted in Et<sub>2</sub>O in an Ar glovebox, filtered (through a filter pipette) into a 20 mL scintillation vial (3x5 mL) and the brown residue left on the filter paper was dissolved in the minimum amount of THF (*ca.* 2 mL) and combined with the Et<sub>2</sub>O extract leaving behind an off-grey residue which was discarded. The combined THF/Et<sub>2</sub>O extract was reduced slowly in volume at RT using an Ar stream (*ca.* 2-3 mL) until crystalline material started depositing. It was refrigerated overnight (-35 °C) before the crystals were carefully separated from the mother-liquor using a down-out pipette, washed with nC<sub>5</sub> and dried in vacuum to yield (**10'**) as a brown crystalline powder. A second crop can be isolated by slow evaporation followed by refrigeration of the combined nC<sub>5</sub> wash and supernatant. X-ray quality crystals of (**10**) can be isolated by refrigeration of a saturated solution (*ca.* 1 mL) of (**10'**) in Et<sub>2</sub>O with a 1-2 drops of THF. Combined yield: 335 mg (81 %). <sup>1</sup>H-NMR (δ(C<sub>4</sub>D<sub>8</sub>O<sub>2</sub>)): -3.46 (s, 18H, Si(CH<sub>3</sub>)<sub>3</sub>), 0.55 (s, 18H, (CH<sub>3</sub>)<sub>3</sub>), 1.76 (br s, 8H, (CH<sub>2</sub>CH<sub>2</sub>)<sub>2</sub>O), 2.58 (br. s, 30H, C<sub>5</sub>(CH<sub>3</sub>)<sub>5</sub>), 3.62 (br m, 8H, (CH<sub>2</sub>CH<sub>2</sub>)<sub>2</sub>O); <sup>29</sup>Si{<sup>1</sup>H}-NMR (δ C<sub>4</sub>D<sub>8</sub>O<sub>2</sub>): -98.88 and -88.22 (s, SiMe<sub>3</sub>); <sup>23</sup>Na{<sup>1</sup>H}-NMR (δ C<sub>4</sub>D<sub>8</sub>O<sub>2</sub>): -7.94 (Δv<sub>1/2</sub> = 78 Hz). No molecular ion could be observed. Elem. Anal: Calcd. for C<sub>56</sub>H<sub>94</sub>NaNO<sub>2</sub>Si<sub>4</sub>U<sub>2</sub> (x = 2; **10'**): C 47.21, H 6.65, N 0.98; Found C 46.97, H 6.59, N 1.01.

Synthesis of [ $U\{\eta^8-C_8H_6(1,4-SiPr_3)_2\}(\eta^5-Cp^*) O\]-[K(18-crown-6)]^+$  (**11**): An ampule was charged with 192 mg (0.238 mmol) of (**3**) and 63 mg of 18-crown-6 (1 mol eq) and nC<sub>5</sub> (*ca.* 10 mL) followed by Et<sub>2</sub>O (*ca.* 2 mL) was added to the solids with vigorous stirring. To this solution were added *via* pipette 2.2 g (1.2 mol eq) of K/Hg (0.5% w/w) and after a few minutes a pink-red solid formed. The reaction mixture was stirred for another 2 hrs at RT before it was filtered and the solids were washed once with nC<sub>5</sub>. To this residue was added toluene (5-10 mL) and was gently heated by means of a heat-gun until (with the aid of stirring) all the pink-red residue had produced a deep red solution with insoluble Hg at the bottom. It was filtered while hot and the filtrate was slowly reduced in vacuum to produce deep red rods of the title compound that were also suitable for single crystal XRD studies. They were isolated by careful decantation of the mother-liquor and washed once with toluene (*ca.* 1 mL), then nC<sub>5</sub> (2 pipette-fulls) and finally Et<sub>2</sub>O (1 pipette full) before drying in vacuum. Yield: 150 mg (52.3%). <sup>1</sup>H-NMR (δ(C<sub>4</sub>D<sub>8</sub>O)): -21.65 (s, 6H, CH(CH<sub>3</sub>)<sub>2</sub>), -17.98 (s, 18H, CH(CH<sub>3</sub>)<sub>2</sub>), -9.87 (br s, 15H, C<sub>5</sub>Me<sub>5</sub>), -5.27 (s,

18H, CH(CH<sub>3</sub>)<sub>2</sub>), 11.56 (s, 24H, CH<sub>2</sub>) the signals for the COT protons could not be located; <sup>29</sup>Si{<sup>1</sup>H}-NMR δ(C<sub>4</sub>D<sub>8</sub>O): -172.22 (s, SiPr<sub>3</sub>); No molecular ion could be observed; Elem. Anal: Calcd. for C<sub>48</sub>H<sub>87</sub>KO<sub>7</sub>Si<sub>2</sub>U: C 51.96, H 7.90; Found C 51.63, H 7.80 (crystals of **(11)** loose C<sub>7</sub>H<sub>8</sub> under vacuum with concurrent loss of crystallinity).

### SQUID MAGNETOMETRY:

Magnetic measurements of polycrystalline (**10'**) were carried out using a Quantum Design MPMS-5 SQUID magnetometer at 0.1 Tesla in the range 2 – 300 K, and for (**9**) and (**3**) using a Quantum Design MPMS-XL SQUID magnetometer at 0.1 Tesla in the range 5 – 300 K. The accurately weighed samples (20 – 40 mg) were placed into a gelatine capsule and then loaded into a nonmagnetic plastic straw before being lowered into the cryostat. Values of the magnetic susceptibility were corrected for the underlying diamagnetic increment by using tabulated Pascal's constants,<sup>viii</sup> and the effect of the blank sample holders (gelatin capsule/straw).

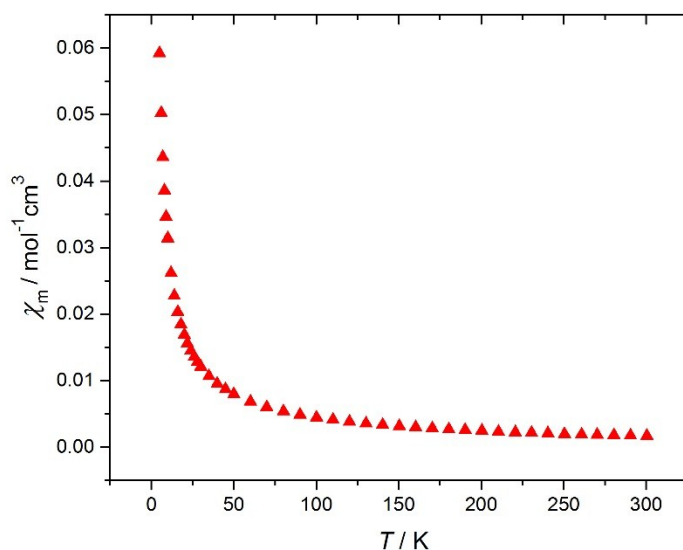

**Figure SI2:** Temperature dependence of the solid state susceptibility  $\chi_m$  of (**3**) at 0.1 Tesla.

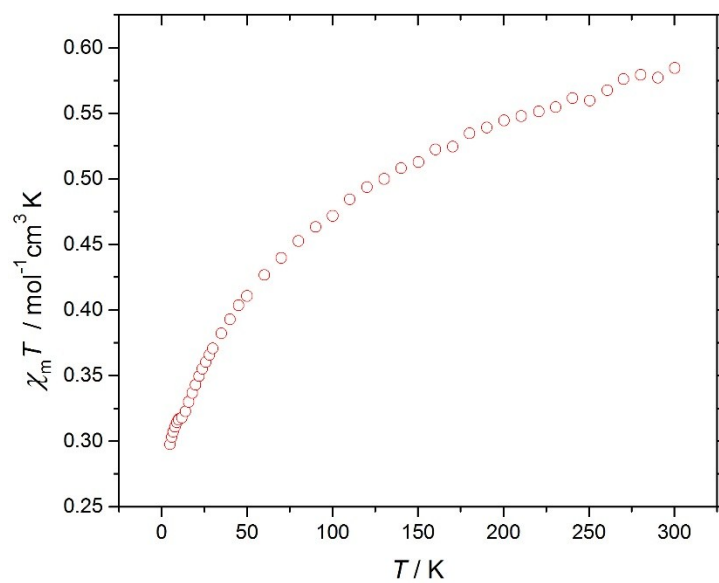

**Figure SI3:** Temperature dependence of the solid state  $\chi_m T$  product of **(3)** at 0.1 Tesla.

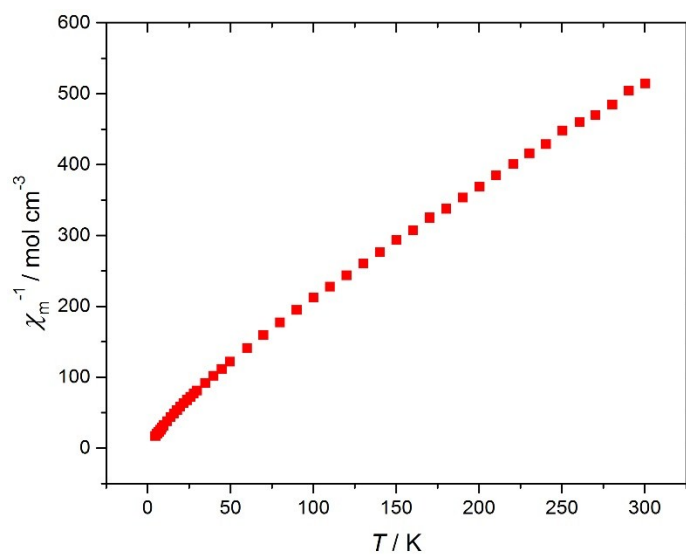

**Figure SI4:** Temperature dependence of the inverse susceptibility  $\chi_m^{-1}$  of **(3)** at 0.1 Tesla.

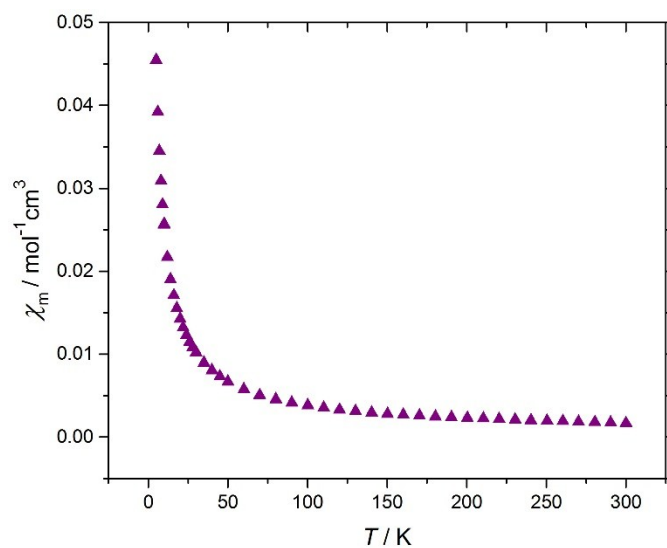

**Figure S15:** Temperature dependence of the solid state susceptibility  $\chi_m$  of **(9)** at 0.1 Tesla.

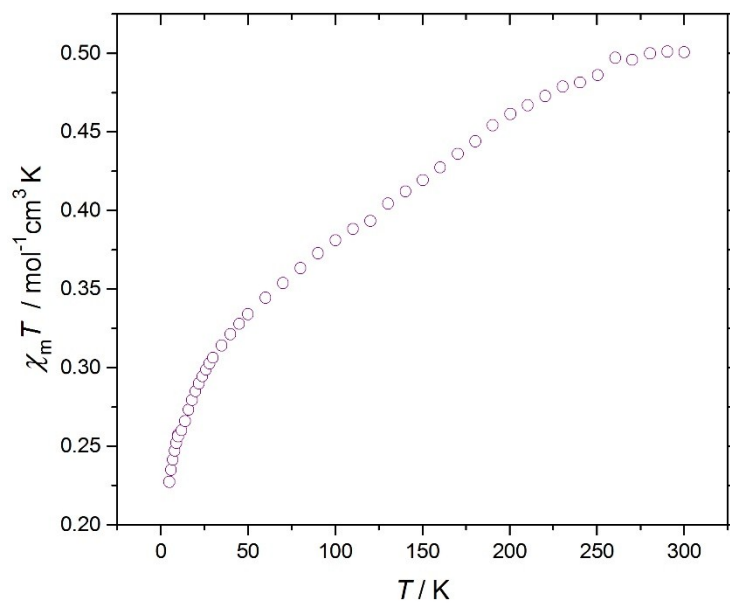

**Figure S16:** Temperature dependence of the solid state  $\chi_m T$  product of **(2)** at 0.1 Tesla.

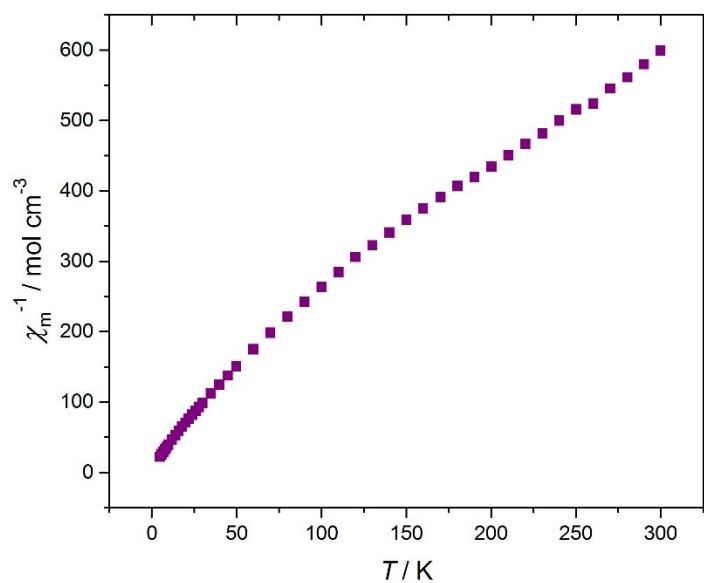

**Figure SI7:** Temperature dependence of the inverse susceptibility  $\chi_m^{-1}$  of (9) at 0.1 Tesla.

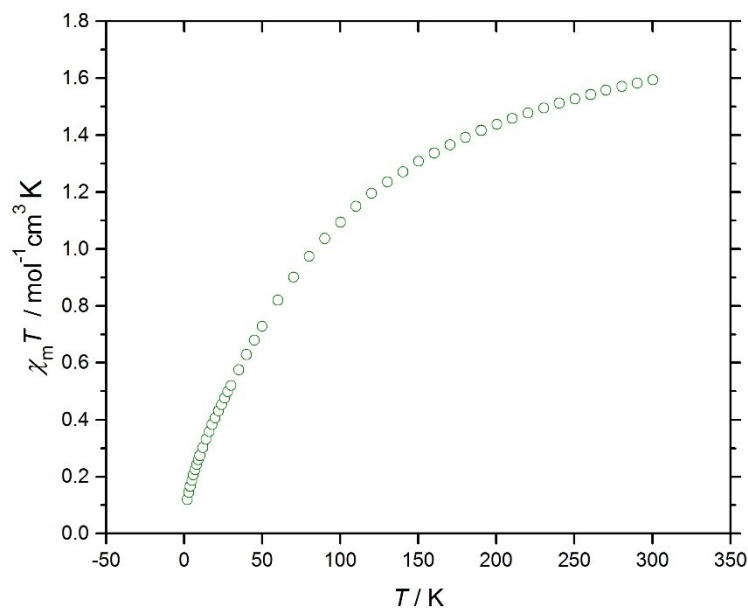

**Figure SI8:** Temperature dependence of the solid state  $\chi_m T$  product of (10') at 0.1 Tesla.

### Cyclic Voltammetry:

Cyclic Voltammetry studies were performed in an Ar glovebox using a BASi-Epsilon potentiostat under computer control. IR drop was compensated using the feedback method. CV experiments were performed using the three electrode method with glassy carbon disk (7.0 mm<sup>2</sup>) as the working electrode, Pt wire as the counter electrode and Ag wire as the pseudoreference electrode. Sample

solutions were prepared by dissolving the appropriate supporting electrolyte in 1mL of solvent followed by addition of the analyte to give a concentration of *ca* 5mM. The reported half potential are referenced to  $\text{Fc}^{0/+}$  redox couple, which was measured by adding ferrocene (*ca* 1mg) to the sample solution. In the case of (**10'**) no processes could be observed using THF and either  $[\text{N}(\text{nBu})_4][\text{B}(\text{C}_6\text{F}_5)_4]$  or  $[\text{N}(\text{nBu})_4]\text{PF}_6$  as the supporting electrolyte or by using Au or Pt as the working electrode. When  $\text{CH}_3\text{CN}$  (dried over  $\text{CaH}_2$  under an Ar, distilled and kept over activated 3 Å molecular sieves) employed as a solvent and  $[\text{N}(\text{nBu})_4]\text{PF}_6$  as electrolyte we managed to observe current responses upon scanning voltages over the solvent window. It has to be noted though that (**10'**) reacts slowly with  $\text{CH}_3\text{CN}$  ( $t_{1/2}$  of approximately 3 hours) and as a result the experiment must be performed as quickly as possible. The product of this reaction is currently under investigation. In the case of (**1**) we used a similar procedure for the reasons previously described and its voltammogram had the same features as the ones observed for complexes of the type  $[\text{U}\{\eta^8\text{-C}_8\text{H}_6(1,4\text{-SiMe}_3)_2\}(\eta^5\text{-Cp}^{\text{Me}4\text{R}})\text{THF}]$  ( $\text{R} = \text{Me}, \text{Et}, \text{iPr}, \text{tBu}$ ).

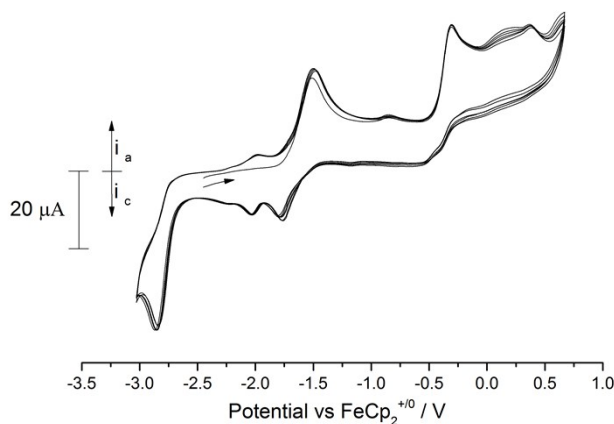

**Figure SI9:** Overlaid CV scans (3 cycles) of (**9**) in 0.05 M  $[\text{N}(\text{nBu})_4][\text{B}(\text{C}_6\text{F}_5)_4]/\text{THF}$  showing the additional processes observed. Scan rate  $100 \text{ mV s}^{-1}$ .

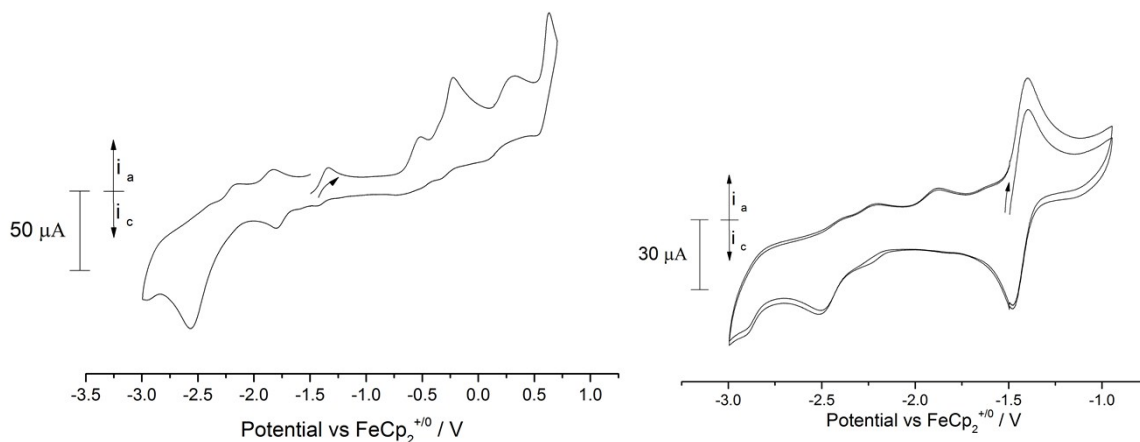

**Figure SI10:** From left to right (a) CV scan of (**10'**) showing the additional processes observed; (b) overlaid CV scan of (**10'**) between -3.0 and -1.0 V. Both in 0.1 M  $[\text{N}(\text{nBu})_4]\text{PF}_6/\text{MeCN}$  and using a scan rate of  $300 \text{ mV.s}^{-1}$ .

As can be seen from Figure SI9 another reversible process at *ca* -1.8 V is present that disappears when a smaller window is scanned. We tentatively assign this process to an electrochemically generated species. More in depth analysis was not possible due to the instability of (**10'**) in MeCN.

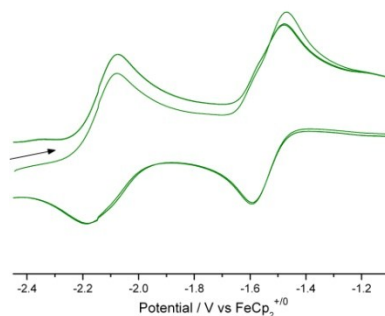

**Figure SI11:** Overlaid CV scans of (**1**) in 0.05M [N(<sup>n</sup>Bu)<sub>4</sub>][B(C<sub>6</sub>F<sub>5</sub>)<sub>4</sub>]/THF. Scan Rate 200 mV.s<sup>-1</sup>.

**Table SI1:** Electrochemical parameters for **3**, **9** and **10**.

| Compound  | E <sub>pa</sub><br>/ mV | E <sub>pc</sub><br>/ mV | ΔE <sub>pp</sub><br>/ mV | i <sub>pa</sub><br>/ μA | i <sub>pc</sub><br>/ μA | i <sub>pc</sub> /i <sub>pa</sub> |
|-----------|-------------------------|-------------------------|--------------------------|-------------------------|-------------------------|----------------------------------|
| <b>3</b>  | -464                    | -573                    | 109                      | 47.01                   | 51.97                   | 1.11                             |
| <b>9</b>  | 237                     | -51                     | 288                      | 41.06                   | 24.96                   | 0.61                             |
| <b>10</b> | 83                      | -4                      | 87                       | 33.81                   | 34.64                   | 1.02                             |

*Potentials measured vs. Ag<sup>+/0</sup> pseudo-reference electrode. ΔE<sub>pp</sub> = | E<sub>pc</sub> - E<sub>pa</sub> |*

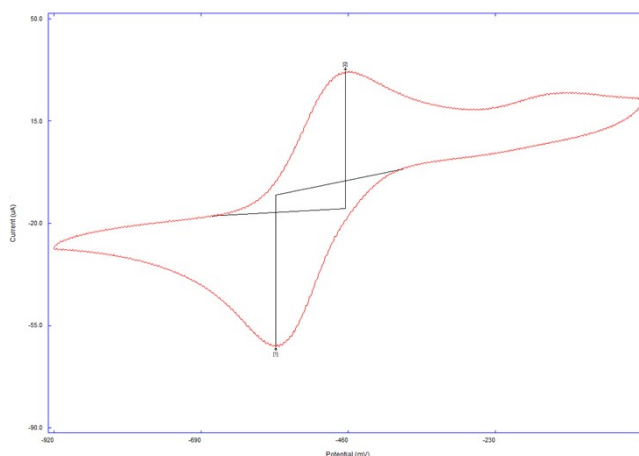

**Figure SI12:** Determination of peak potentials and currents for **3**.

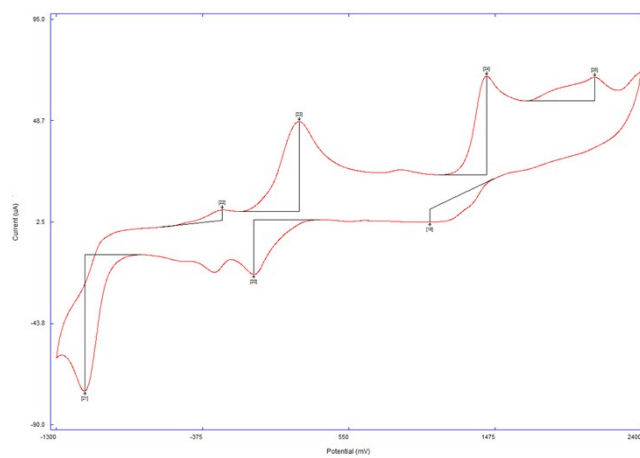

**Figure SI13:** Determination of peak potentials and currents for 9.

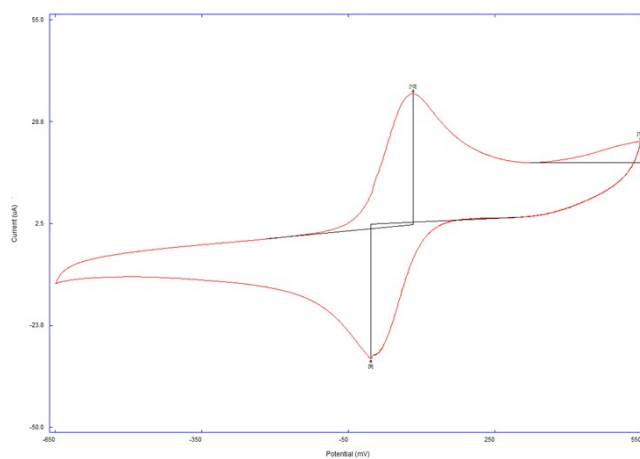

**Figure SI14:** Determination of peak potentials and currents for 10.

**UV-Visible Spectroscopy:** For **(3)** two absorptions at 392 nm ( $\epsilon_{\text{max}} = 3515.7 \text{ cm}^{-1} \cdot \text{M}^{-1}$ ) and 463 nm ( $\epsilon_{\text{max}} = 2270.4 \text{ cm}^{-1} \cdot \text{M}^{-1}$ ); for **(9)** two absorptions at 388 nm ( $\epsilon_{\text{max}} = 2455.7 \text{ cm}^{-1} \cdot \text{M}^{-1}$ ) and 478 nm ( $\epsilon_{\text{max}} = 2193.4 \text{ cm}^{-1} \cdot \text{M}^{-1}$ ); for **(10)** no discernible absorptions could be detected in the region scanned before the onset of the LMCT band. In the range of 210-300 nm all complexes exhibited strong absorptions attributed to LMCT bands, resulting in saturation of the detector even in very low concentrations (2-5 mM).

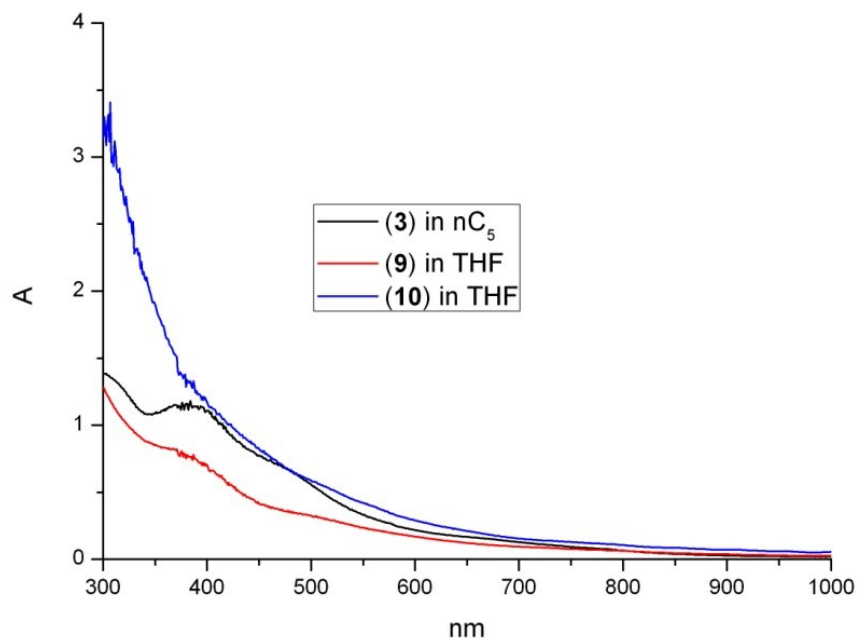

**Figure SI15:** UV-VIS Spectra of **(3)**, **(9)** and **(10)**

### **<sup>23</sup>Na NMR Spectra :**

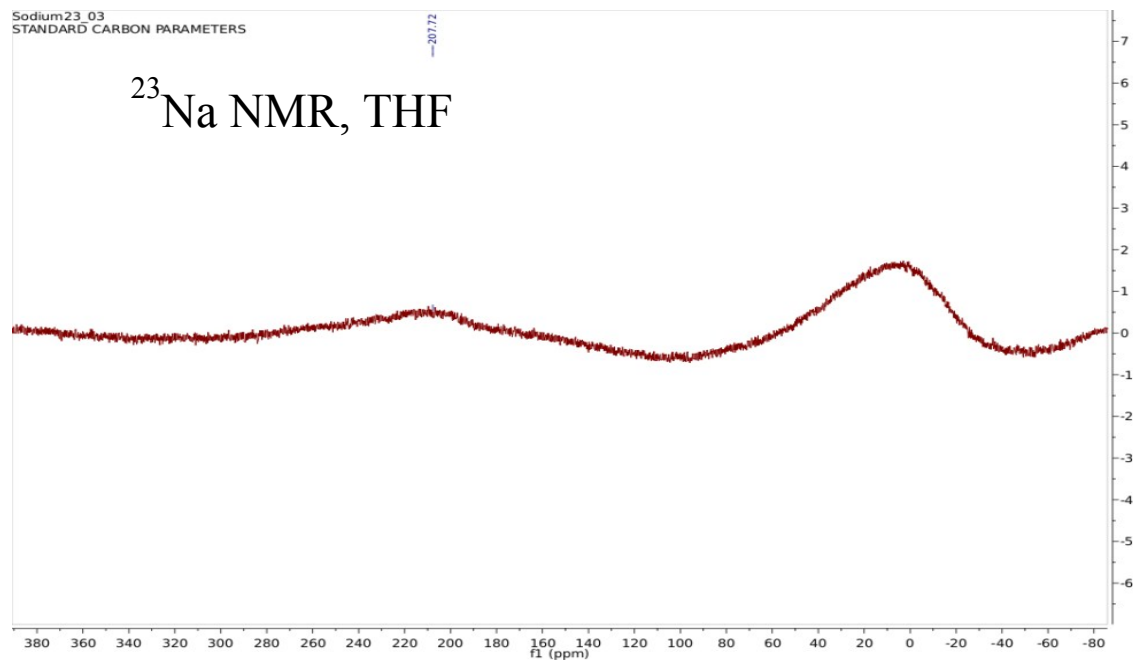

**Figure SI16:** <sup>23</sup>Na NMR Spectrum of **(9)**

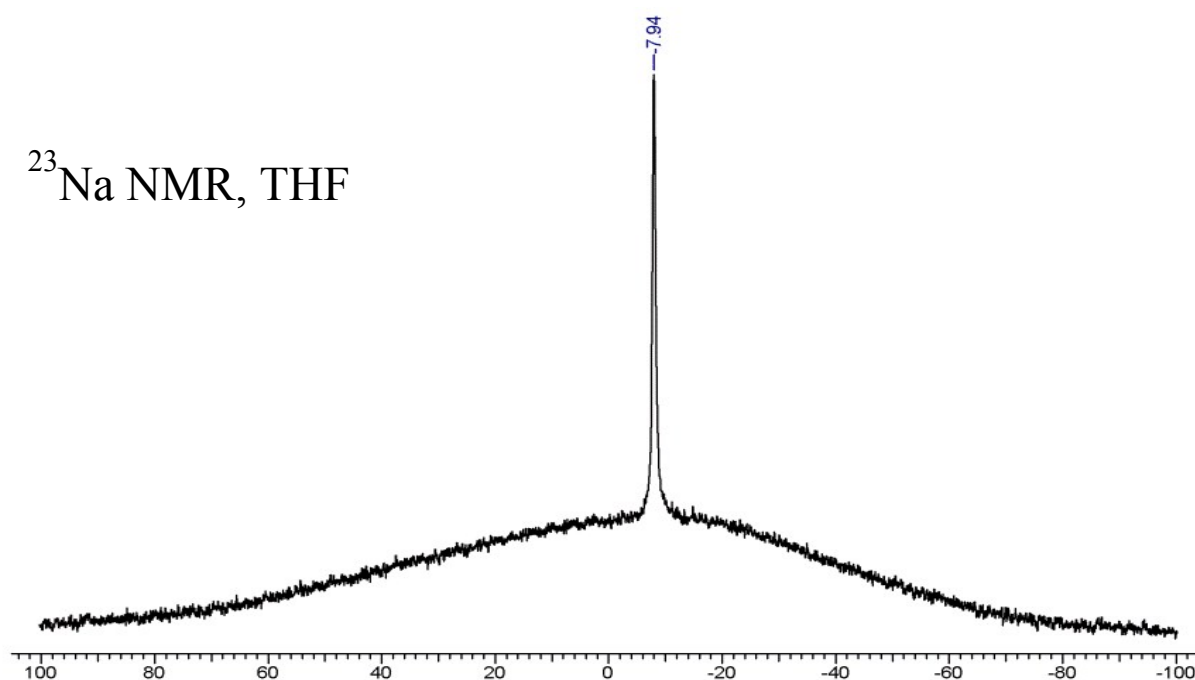

**Figure SI17:**  $^{23}\text{Na}$  NMR Spectrum of (10)

**X-ray crystallography:** Datasets for all complexes herein were collected using an Agilent Gemini Ultra diffractometer with an Enhance (Mo  $K\alpha$ ) (for (3), (4) and (11)) or an Enhance Ultra source (Cu  $K\alpha$ ) (for (7), (9) and (10)) source, equipped with an Eos CCD area detector and an Oxford Cryosystems low-temperature device (173 K), operating in  $\omega$  scanning mode with  $\psi$  and  $\omega$  scans to fill the Ewald sphere. Control, integration and absorption correction were handled by the CrysAlis Pro software. The crystals were mounted on MiTiGen loops, from dried vacuum oil kept over  $4\text{\AA}$  in a MBraun glovebox under Ar. All solutions and refinements were performed using the WinGX package and all software packages within. All non-hydrogen atoms were refined using anisotropic thermal parameters, and hydrogens were added using a riding model. Crystal structure, data collection and refinement details are given Table SI1. CCDC numbers 1449997-1450002 for compounds (3), (4), (7), (9), (10), and (11)

| Compound                              | (3)                                                | (4)                                                 | (7)                                                | (9)                                                                               | (10)                                                                              | (11)                                                                                            |
|---------------------------------------|----------------------------------------------------|-----------------------------------------------------|----------------------------------------------------|-----------------------------------------------------------------------------------|-----------------------------------------------------------------------------------|-------------------------------------------------------------------------------------------------|
| Colour, Habit                         | Brown-red, Plate                                   | Brown, Irregular                                    | Red, Plate                                         | Brown, Plate                                                                      | Brown, Irregular                                                                  | Red, Rod                                                                                        |
| Size/mm                               | 0.15x0.15x0.08                                     | 0.2x0.1x0.05                                        | 0.2x0.1x0.05                                       | 0.25x0.15x0.03                                                                    | 0.15x0.12x0.08                                                                    | 0.30x0.1x0.05                                                                                   |
| Empirical Formula                     | C <sub>36</sub> H <sub>63</sub> OSi <sub>2</sub> U | C <sub>41</sub> H <sub>72</sub> NOSi <sub>2</sub> U | C <sub>39</sub> H <sub>72</sub> OSi <sub>3</sub> U | C <sub>44</sub> H <sub>83</sub> NaN <sub>2</sub> O <sub>2</sub> Si <sub>2</sub> U | C <sub>72</sub> H <sub>126</sub> NNaO <sub>6</sub> Si <sub>4</sub> U <sub>2</sub> | C <sub>43</sub> H <sub>87</sub> KO <sub>6</sub> Si <sub>2</sub> U.C <sub>7</sub> H <sub>8</sub> |
| M                                     | 806.7                                              | 889.2                                               | 879.26                                             | 975.31                                                                            | 1485.33                                                                           | 600.81                                                                                          |
| Crystal System                        | Monoclinic                                         | Monoclinic                                          | Orthorhombic                                       | Monoclinic                                                                        | Triclinic                                                                         | Monoclinic                                                                                      |
| Space Group                           | <i>C2/c</i>                                        | <i>P2<sub>1</sub>/c</i>                             | <i>Pnma</i>                                        | <i>P2<sub>1</sub>/m</i>                                                           | <i>P-1</i>                                                                        | <i>P2<sub>1</sub>/m</i>                                                                         |
| <i>a</i> /Å                           | 38.0927(19)                                        | 22.8816(13)                                         | 16.6069(13)                                        | 10.7251(2)                                                                        | 12.3696(4)                                                                        | 11.1168(4)                                                                                      |
| <i>b</i> /Å                           | 11.6377(6)                                         | 12.0603(5)                                          | 22.4849(19)                                        | 18.7626(3)                                                                        | 13.4214(5)                                                                        | 19.7384(6)                                                                                      |
| <i>c</i> /Å                           | 16.7259(7)                                         | 16.2087(8)                                          | 11.2503(11)                                        | 11.9516(2)                                                                        | 21.7314(6)                                                                        | 13.0100(5)                                                                                      |
| $\alpha^\circ$                        | 90                                                 | 90                                                  | 90                                                 | 90                                                                                | 98.997(3)                                                                         | 90                                                                                              |
| $\beta^\circ$                         | 100.791(5)                                         | 108.372(6)                                          | 90                                                 | 95.2380(10)                                                                       | 99.477(2)                                                                         | 90.901(3)                                                                                       |
| $\gamma^\circ$                        | 90                                                 | 90                                                  | 90                                                 | 90                                                                                | 109.711(3)                                                                        | 90                                                                                              |
| V/ Å <sup>3</sup>                     | 7283.7(6)                                          | 4245.0(4)                                           | 4200.9(6)                                          | 2394.99(7)                                                                        | 3261.6(2)                                                                         | 2854.40(17)                                                                                     |
| Z                                     | 8                                                  | 4                                                   | 4                                                  | 4                                                                                 | 2                                                                                 | 4                                                                                               |
| $\mu/\text{mm}^{-1}$                  | 4.548                                              | 3.909                                               | 11.880                                             | 10.344                                                                            | 14.900                                                                            | 3.005                                                                                           |
| T (K)                                 | 173(2)                                             | 173(2)                                              | 173(2)                                             | 173(2)                                                                            | 173(2)                                                                            | 173(2)                                                                                          |
| $\theta_{\text{min/max}}$             | 3.236/26.372                                       | 3.378/26.199                                        | 9.733/67.079                                       | 3.714/71.569                                                                      | 3.593/70.167                                                                      | 3.6430/27.9870                                                                                  |
| Completeness                          | 99.8 to 26.372                                     | 83.9 to 26.199                                      | 98.9 to 67.079                                     | 97.4 to 71.569                                                                    | 96.1 to 70.167                                                                    | 99.8 to 27.98                                                                                   |
| Reflections Total/Independent         | 7446/6027                                          | 9665/7542                                           | 3802/2307                                          | 4694/4318                                                                         | 11925/9505                                                                        | 6004/ 5357                                                                                      |
| $R_{\text{int}}$                      | 0.0495                                             | 0.0594                                              | 0.1458                                             | 0.0728                                                                            | 0.0448                                                                            | 0.0604                                                                                          |
| Final $R$ and $wR2$                   | 0.0344 and 0.0705                                  | 0.0594 and 0.1376                                   | 0.0983 and 0.2983                                  | 0.0305 and 0.0762                                                                 | 0.0388 and 0.0908                                                                 | 0.0371 and 0.0744                                                                               |
| Larget peak hole/ e.Å <sup>-3</sup>   | 1.065 and -0.763                                   | 1.544 and -1.006                                    | 1.595 and -2.345                                   | 1.540 and -1.381                                                                  | 1.386 and -0.856                                                                  | 1.454 and -1.438                                                                                |
| $\rho_{\text{calc}}/\text{g.cm}^{-3}$ | 1.470                                              | 1.391                                               | 1.390                                              | 1.352                                                                             | 1.460                                                                             | 1.462                                                                                           |

**Table SI 2: X-Ray Data**

- 
- <sup>i</sup> O. T. Summerscales, F. G. N. Cloke, P. B. Hitchcock, J. C. Green and N. Hazari, *Science*, 2006, **311**, 829.
- <sup>ii</sup> N. Tsoureas, O. T. Summerscales, F. G. N. Cloke and S. M. Roe, *Organometallics*, 2013, **32**, 1353.
- <sup>iii</sup> J. A. Higgins, F. G. N. Cloke and S. M. Roe, *Organometallics*, 2013, **32**, 5244-5252
- <sup>iv</sup> S. M. Mansell, J. H. Farnaby, A. I. Germeroth, P. L. Arnold, *Organometallics*, 2013, **32**, 4214-4222.
- <sup>v</sup> G. Zi, L. Jia, E. L. Werkema, M. D. Walter, J. P. Gottfriesden, R. A. Andersen, *Organometallics*, 2005, **24**, 4251-4264
- <sup>vi</sup> M. Porchia, N. Brianese, U. Casellato, F. Ossola, G. Rossetto and P. Zanella, *J. Chem. Soc., Dalton Trans.*, 1989, 677-681
- <sup>vii</sup> V. Mougel, C. Camp, J. Pécaut, C. Copéret, L. Maron, C. E. Kefalidis, M. Mazzanti *Angew. Chem. Intl. Ed.*, 2012, **51**, 12280-12284.
- <sup>viii</sup> G. A. Bain and J. F. Berry, *J. Chem. Educ.*, 2008, **85**, 532–536.
